# Supplementary material for: The influence of equine body weight gain on inflammatory cytokine expressions of adipose tissue in response to endotoxin challenge
Source: Acta Vet Scand. 2020 Apr 22;62:17. doi: 10.1186/s13028-020-00515-5 (PMC7178607; doi:10.1186/s13028-020-00515-5)
Supplement: Supplementary file 3 — Additional file 3. RT-qPCR validation parameters. [file 13028_2020_515_MOESM3_ESM.xlsx]

## Sheet: Tabelle1
qPCR validation
Gene	Parameter	retroperitoneal AT	mesocolonial AT	subcutaneous AT of the neck	subcutaneous AT lateral to the tail head
CD68	Cq of NTC	33.37	32.35	33.17	32.08
	Slope	-3.37	-3.36	-3.38	-3.36
	y-intercept	30.6	30.11	30.64	30.767
	R2	0.995	0.972	0.993	0.986
	PCR efficiency	0.980322	0.984354	0.976323	0.984354
IL-1B	Cq of NTC	32.72	32.27	31.34	31.98
	Slope	-3.47	-3.51	-3.5	-3.55
	y-intercept	31.7	31.77	31.09	31.67
	R2	0.997	0.972	0.992	0.998
	PCR efficiency	0.94171	0.927082	0.930698	0.912891
IL-6	Cq of NTC	29.76	29.81	29.9	29.31
	Slope	-3.296	-3.28	-3.32	-3.2
	y-intercept	31.65	31.7	31.88	31.098
	R2	0.987	0.992	0.997	0.992
	PCR efficiency	1.01094	1.0178	1.00081	1.05353
TNFa	Cq of NTC	28.63	28.31	28.27	26.35
	Slope	-2.74	-2.81	-2.84	-2.88
	y-intercept	31.14	31.32	31.28	29.34
	R2	0.986	0.973	0.99	0.993
	PCR efficiency	1.3172	1.2692	1.24964	1.22445
FABP4	Cq of NTC	26.2	26.09	26.19	26.21
	Slope	-3.31	-3.33	-3.3	-3.31
	y-intercept	24.07	24.392	24.1	24.13
	R2	0.985	0.974	0.989	0.989
	PCR efficiency	1.005	0.996642	1.00923	1.005
LPL	Cq of NTC	33.69	33.03	33.73	33.15
	Slope	-3.65	-3.69	-3.66	-3.63
	y-intercept	29.72	29.92	29.26	29.69
	R2	0.989	0.984	0.997	0.998
	PCR efficiency	0.879198	0.866391	0.875962	0.885741
18S	Cq of NTC	36.31	36.28	36.53	36.77
	Slope	-4.56	-4.43	-4.69	-4.31
	y-intercept	23.57	22.91	22.95	22.56
	R2	0.956	0.996	0.993	0.996
	PCR efficiency	0.656907	0.681642	0.633878	0.706155
RPL32	Cq of NTC	30.65	29.38	30.47	29.1
	Slope	-3.45	-3.48	-3.46	-3.65
	y-intercept	28.35	27.58	28.87	27.65
	R2	0.996	0.986	0.976	0.999
	PCR efficiency	0.949194	0.938011	0.945438	0.879198
