# Supplementary material for: The influence of equine body weight gain on inflammatory cytokine expressions of adipose tissue in response to endotoxin challenge
Source: Acta Vet Scand. 2020 Apr 22;62:17. doi: 10.1186/s13028-020-00515-5 (PMC7178607; doi:10.1186/s13028-020-00515-5)
Supplement: Supplementary file 6 — Additional file 6. Original data of AT gene expression. [file 13028_2020_515_MOESM6_ESM.xlsx]

## Sheet: CD68
CD68	normalized mRNA levels~
Adipose tissue depot		retroperitoneal AT				mesocolonial AT				subcutaneous AT of the neck				subcutaneous AT lateral to the tail head
Breed	ID	t0	t1	t2		t0	t1	t2		t0	t1	t2		t0	t1	t2
Pony	1	0.0808013	0.844224	0.548498		0.321956	0.306906	0.724867		0.0433734	0.33494	0.41918		0.0434681	1.00636	0.997314
Pony	3	0.0838933	1.21243	2.29588		1.07297	2.48736	2.47795		0.0562924	0.0829306	0.911028		0.113014	0.619771	0.572447
Pony	5	0.176438	0.516059	0.941702		0.066218	0.930924	1.43403		0.0361911	0.058	0.97849		0.0292216	0.694783	0.775337
Pony	7*	0.322313	1.63061	6.084		0.918046	40.1284	5.23375		0.0495056	0.22585	0.633978		0.0561236	0.861224	3.20661
Pony	11	0.552534	0.496679	0.168304		0.246058	0.238312	0.147202		0.120874	0.11872	0.0763461		0.0684703	0.261953	0.182764
Pony	13	0.0710093	0.592643	1.32172			0.174514	0.146472			0.544958	0.0859415		0.0344435	0.634827	3.66934
Pony	15	0.0554467	0.115215	0.13566		0.215314	0.137482	0.130375		0.0308732	0.0514551	0.0573889		0.0647151	0.218607	0.121804
Pony	17		0.0432433	4.03986			0.167484	2.77438			0.0531203	0.326515		0.0319449	0.183834	1.07098
Pony	19		0.369054	0.470123			0.150634	1.35791			0.112634	0.0817274		0.0491799	0.0981426	1.08844
Pony	21	0.124496	0.300744	0.180525		0.18654	0.132688	0.300351		0.0615557	0.143151	0.0482226		0.0993887	0.0980611	0.21057
Horse	4*	0.217946	1.18233	7.37846		0.275811	2.37269	13.6854		0.071828	0.419458	0.484112		0.143995	1.29898	0.258589
Horse	6#	0.164911	2.02711	1.51777		0.115215	0.541278	6.3491		0.0767187	0.245389	0.379528		0.135166	2.35565	0.195961
Horse	8	0.132437	0.555574	0.638961		0.203144	0.245519	0.42421		0.0755904	0.303909	0.533952		0.151871	1.20542	0.59626
Horse	10	0.0954809	1.96421	0.651604		0.172803	0.22829	0.283504		0.0677819	0.0853625	0.0750602		0.108987	0.462989	0.315476
Horse	12	0.0990771	1.23389	0.858982		0.233765	0.511311	3.6922		0.0792945	0.347911	0.171481		0.179561	0.478291	1.26008
Horse	14	0.102219	0.334921	0.380167		0.16	0.660567	0.233899		0.0392613	0.151299	0.190738		0.0563879	0.402771	0.855907
Horse	16	0.189157	2.41329	2.28829		0.902991	3.96791	3.71849		0.0935746	0.19252	0.210154		0.088339	0.461919	1.06643
Horse	20	0.164721	0.719893	0.40887		0.150218	0.408497	1.09432		0.20034	0.186955	0.0629128		0.173239	0.215464	0.126851
Horse	22	0.134768	0.127659	0.328957		0.193171	0.266894	0.290149		0.0935233	0.0695507	0.211379		0.162631	0.117261	0.160088
~original data normalized against the geometric mean of the reference genes RPL32 and 18S
* equines with ID and laminitis
# equine with ID

## Sheet: IL-1β
IL-1β	normalized mRNA levels~
Adipose tissue depot		retroperitoneal AT				mesocolonial AT				subcutaneous AT of the neck				subcutaneous AT lateral to the tail head
Breed	ID	t0	t1	t2		t0	t1	t2		t0	t1	t2		t0	t1	t2
Pony	1	1.12836	0.231335	2.40712		3.14804	1.70821	0.091997		8.45348	0.818111	1.82696		2.30043	2.19979	2.41464
Pony	3	1.06999	1.96423	0.360117		1.27814	2.23069	0.593727		1.61366	2.33215	1.34959		1.39319	1.25802	1.15752
Pony	5	4.87285	0.790773	0.595964		4.15986	0.82259	0.556712		4.8552	2.75828	1.41456		2.71812	1.78337	1.52496
Pony	7*	1.70876	0.599517	0.381308		0.664026	1.13538	0.62868		1.59543	1.67232	0.905541		4.19748	1.69546	0.818323
Pony	11	2.24219	0.886192	0.827308		3.06444	0.416651	0.848228		7.22512	1.98296	0.951943		2.54849	0.955514	1.24009
Pony	13	1.47282	0.395365	0.800031			0.780267	0.80274			0.514297	1.71776		2.01811	1.35927	1.36237
Pony	15	1.64569	1.76236	0.550722		3.07435	0.887815	0.314023		5.23493	2.45531	2.99432		1.50938	2.51536	1.25668
Pony	17		3.97536	0.414258			3.95105	0.468683			3.3891	3.73075		2.67393	3.90915	1.70611
Pony	19		0.96129	0.817767			0.586057	0.386532			3.86257	2.45237		1.44945	2.01379	1.06556
Pony	21	2.04974	0.950107	1.51565		3.15999	1.78536	0.697279		4.39314	5.01014	3.46875		7.98226	2.43767	2.41267
Horse	4*	2.12397	0.575904	0.764657		5.47476	1.23711	0.66095		0.914603	2.57124	1.20594		1.07904	1.28805	1.44188
Horse	6#	1.47922	0.890812	0.544634		2.49693	1.06298	1.47157		2.0041	1.71816	1.41083		2.92533	0.602368	0.907704
Horse	8	1.14969	0.336894	0.711908		0.741448	2.94384	1.43046		3.65683	3.01602	1.01837		1.29303	1.27251	1.16097
Horse	10	1.26761	0.760034	0.201908		2.78762	1.16501	0.892992		2.41835	4.33297	1.19739		2.50141	1.76429	1.39988
Horse	12	1.06855	1.05565	0.393407		1.5647	0.370407	0.797582		1.99829	1.92626	1.40077		3.18357	2.13188	1.03304
Horse	14	1.70032	2.72162	1.45113		1.90459	1.12385	1.62081		1.11874	2.26571	1.5104		1.09104	3.77652	1.15859
Horse	16	0.681365	1.78747	0.674425		1.28678	1.9232	1.20685		2.53586	4.7458	1.30802		1.57833	3.60219	1.80028
Horse	20	0.826684	0.825937	0.678145		1.47545	0.829538	0.989753		1.45314	2.96061	1.63755		1.49162	2.36952	1.2658
Horse	22	1.25813	1.73639	0.492577		3.48629	1.43161	0.539684		1.18936	3.11964	1.87261		1.04849	4.40879	2.02837
~original data normalized with the geometric mean of the reference genes RPL32 and 18S
*equines with ID and laminitis
# equine with ID

## Sheet: IL-6
IL-6	normalized mRNA levels~
Adipose tissue depot		retroperitoneal AT				mesocolonial AT				subcutaneous AT of the neck				subcutaneous AT lateral to the tail head
Breed	ID	t0	t1	t2		t0	t1	t2		t0	t1	t2		t0	t1	t2
Pony	1	0.780796	0.248682	1.31586		1.56365	1.33981	0.366247		4.65328	0.788679	1.00684		1.76112	1.32088	1.15616
Pony	3	0.971167	1.75417	0.749395		1.27723	2.48681	0.490769		1.79303	1.92359	1.20238		1.45873	1.48025	1.30467
Pony	5	2.45017	0.609234	0.487623		2.08202	0.732002	0.336259		2.44562	2.13054	0.678761		1.65115	1.50106	0.878137
Pony	7*	1.65703	0.552296	0.397947		0.957223	1.37454	0.584186		1.02351	1.61087	0.787706		2.96508	1.81452	0.637111
Pony	11	1.4802	0.698089	0.591157		2.02308	0.416987	0.586312		3.87909	1.8859	0.7518		1.6442	0.848805	1.08791
Pony	13	1.10526	0.359211	0.591723			0.64169	0.668626			0.632648	1.32682		0.705389	0.818792	1.25925
Pony	15	0.984026	1.28242	0.380382		1.78052	1.126	0.264021		3.63482	1.77961	1.93141		0.979509	1.9691	0.839505
Pony	17		2.27901	0.337286			2.65554	0.466614			1.83453	2.12532		1.96449	2.55068	1.18523
Pony	19		0.886617	0.654433			0.678175	0.548305			3.11948	2.29036		3.52276	2.83282	1.02079
Pony	21	0.833917	0.48141	0.600526		1.19704	0.854666	0.425859		2.29875	2.73471	1.29575		3.57039	1.0373	0.840617
Horse	4*	1.6334	0.649934	0.580497		4.03373	0.969483	0.508309		0.927114	2.14673	0.939088		1.01041	1.14349	1.12326
Horse	6#	0.936714	0.799327	0.431547		1.36156	0.665734	0.870084		1.64903	1.20119	1.12949		1.7013	0.868492	0.708621
Horse	8	0.823732	0.305358	0.560641		0.576628	1.82452	0.956594		2.53443	2.17956	0.637366		0.835579	1.23031	0.822931
Horse	10	0.7572	0.528173	0.217898		1.14531	0.730329	0.594005		1.78209	3.12986	0.75794		1.96837	1.49039	0.761215
Horse	12	0.593627	0.746152	0.398365		1.01769	0.372091	0.640842		1.24897	1.21661	1.07203		2.34207	1.558	0.722463
Horse	14	0.993689	1.66487	1.1158		1.04466	1.23801	1.31704		0.83044	1.92132	1.00324		0.833693	2.48579	0.774029
Horse	16	0.54331	1.30092	0.468576		0.973429	1.31823	0.765836		1.88869	3.17365	1.02009		1.0277	3.20206	1.25756
Horse	20	0.562277	0.964271	0.513513		0.856648	0.958464	0.903944		1.27344	1.77526	1.36892		1.03426	1.66878	1.26551
Horse	22	0.745967	1.36741	0.476651		2.06645	1.19988	0.546576		1.36992	2.7101	1.38968		0.836031	2.6459	1.38447
~original data normalized against the geometric mean of the reference genes RPL32 and 18S
* equines with ID and laminitis
# equine with ID

## Sheet: TNFα
TNFα	normalized mRNA levels~
Adipose tissue depot		retroperitoneal AT				mesocolonial AT				subcutaneous AT of the neck				subcutaneous AT lateral to the tail head
Breed	ID	t0	t1	t2		t0	t1	t2		t0	t1	t2		t0	t1	t2
Pony	1	0.747625	0.291337	0.986717		1.66671	0.988613	0.717204		3.5484	0.735856	0.724249		1.60852	0.321763	1.0484
Pony	3	0.969129	1.45728	0.659458		1.78441	2.20093	0.463174		1.68445	1.33747	0.874487		1.69249	1.2563	1.32998
Pony	5	2.00817	0.541978	0.319552		1.63683	0.535356	0.301458		2.19973	1.82593	0.491285		1.89643	1.54999	0.714069
Pony	7*	1.52017	0.543005	0.3732		0.903061	1.05411	0.507398		0.941629	1.32963	0.564623		3.03934	1.69292	0.615837
Pony	11	1.3992	0.638116	0.476724		1.8508	0.3394	0.456294		3.90381	1.65908	0.544984		1.94677	0.818381	0.775275
Pony	13	1.14804	0.372539	0.523629			0.539891	0.555986			0.455534	0.978932		1.36438	1.39673	0.89246
Pony	15	0.692738	1.04756	0.272197		1.72035	0.846539	0.238585		3.25093	1.3507	1.80003		0.859359	1.8064	0.754433
Pony	17		1.96242	0.211402			2.55875	0.348303			1.36562	1.68983		1.60184	2.80292	1.18309
Pony	19		0.784263	0.504458			0.635174	1.55306			3.25529	1.77908		2.41175	2.45386	0.931958
Pony	21	0.852295	0.40138	0.510999		1.32921	0.765171	0.380846		1.7111	2.23257	1.19196		2.93947	1.18109	0.808404
Horse	4*	1.26117	0.526459	0.600477		3.58902	0.199265	0.536952		0.613118	1.78418	0.897625		1.30365	1.10253	1.01156
Horse	6#	0.947964	0.577467	0.226462		1.23724	0.586502	0.741687		1.35916	1.1286	0.844861		1.79708	0.446168	0.646472
Horse	8	0.842843	0.295537	0.470625		0.565372	2.17362	0.937615		1.954	1.80465	0.577826		0.866949	1.19138	0.809107
Horse	10	0.646779	0.484849	0.15819		1.84749	0.581326	0.470505		1.54856	2.92782	0.488256		1.91321	1.49865	0.920188
Horse	12	0.519811	0.83801	0.287654		1.00577	0.260134	0.484784		1.24289	1.30164	0.810635		2.23568	1.5994	0.767739
Horse	14	0.739021	1.28988	0.975479		1.02219	0.966061	1.38298		0.726955	1.41927	0.839638		0.902078	2.10264	0.758674
Horse	16	0.445852	1.04478	0.387671		0.886168	1.25607	0.849312		1.5323	3.1632	0.759368		1.22156	3.18286	0.344735
Horse	20	0.456464	0.735341	0.438586		0.743254	0.556936	0.92469		0.96779	1.74969	0.971164		1.878	1.26783	0.907823
Horse	22	0.740367	1.26167	0.363999		2.02935	0.990376	0.459641		1.09916	2.05755	1.04418		0.747958	2.97932	1.53684
~original data normalized against the geometric mean of the reference genes RPL32 and 18S
* equines with ID and laminitis
# equine with ID

## Sheet: FABP4
FABP4	normalized mRNA levels~
Adipose tissue depot		retroperitoneal AT				mesocolonial AT				subcutaneous AT of the neck				subcutaneous AT lateral to the tail head
Breed	ID	t0	t1	t2		t0	t1	t2		t0	t1	t2		t0	t1	t2
Pony	1	1.20329	1.33391	0.225426		1.71147	2.44956	0.121448		0.0340139	0.895886	0.176741		0.0487865	1.13292	0.230642
Pony	3	0.563083	1.51611	0.391416		0.435162	8.29812	1.94629		0.0741826	0.106167	0.156572		0.194127	2.20001	0.287222
Pony	5	0.272278	1.04226	1.74005		0.233331	0.680629	2.53669		0.0262502	0.162528	0.651839		0.0119602	0.588236	1.19219
Pony	7*	0.0691543	1.48701	0.560445		0.0566895	1.14689	0.128185		0.103016	0.549129	0.0476699		0.0755703	0.739141	0.362922
Pony	11	0.979563	1.22947	1.4371		1.43477	2.85266	2.04961		0.00783579	0.49932	0.399956		0.0496096	1.69645	2.00948
Pony	13	0.557224	0.845508	0.707221			0.626556	1.05966			0.134353	0.206643		0.0125648	0.917194	0.614535
Pony	15	0.463559	0.733651	1.4724		0.576888	1.17705	1.39088		0.00813521	0.202776	0.277842		0.157147	0.251924	0.797221
Pony	17		0.0688981	0.47343			1.28083	0.598938			0.101588	0.191507		0.00828874	0.223736	0.235143
Pony	19		1.79737	0.937996			2.1728	0.210959			0.156025	0.447581		0.0437585	0.500998	0.585753
Pony	21	0.846552	1.49169	1.47496		1.81454	1.19505	1.47215		0.0578175	0.580672	0.295348		0.0581509	0.692433	1.13595
Horse	4*	0.921352	0.884178	0.329996		1.58529	1.52669	0.774579		0.105074	1.04561	0.168024		1.0641	1.25483	0.216236
Horse	6#	1.07293	1.03707	0.691021		1.44381	1.48412	0.676018		0.496283	1.12104	0.703068		0.713998	1.26264	0.381678
Horse	8	0.93353	0.764005	0.508885		1.50975	0.952063	1.41041		0.332219	0.581905	0.658512		0.41501	1.7815	1.12054
Horse	10	1.9415	0.648429	1.91411		2.37167	1.80412	3.26742		0.0485012	0.236718	0.750931		1.42971	1.2287	2.03628
Horse	12	0.793344	0.923671	1.00184		1.40674	1.613	1.80316		0.450796	1.06113	0.578589		0.587773	0.774792	1.83076
Horse	14	1.50172	0.832207	0.605846		1.76168	1.8822	1.31744		0.13539	0.411896	0.645623		2.36212	1.33649	1.07156
Horse	16	0.982796	1.00391	0.629968		0.767764	1.77035	0.583676		0.349185	0.776235	0.387424		0.783829	0.441501	2.2851
Horse	20	1.63637	0.953818	1.13968		2.13849	0.774716	1.06606		0.591143	0.719958	1.17523		1.93409	1.30928	2.88508
Horse	22	1.48006	0.618482	0.58794		1.89894	1.48838	0.967705		0.123292	0.270891	0.309701		1.81989	0.793624	0.667834
~original data normalized against the geometric mean of the reference genes RPL32 and 18S
* equines with ID and laminitis
# equine with ID

## Sheet: LPL
LPL	normalized mRNA levels~
Adipose tissue depot		retroperitoneal AT				mesocolonial AT				subcutaneous AT of the neck				subcutaneous AT lateral to the tail head
Breed	ID	t0	t1	t2		t0	t1	t2		t0	t1	t2		t0	t1	t2
Pony	1	5.96218	1.00703	0.108349		7.02199	1.66484	0.202946		0.04383	0.413125	0.155108		0.0496048	0.587751	0.308966
Pony	3	0.73895	1.51081	0.595035		0.887638	5.1201	2.26692		0.012847	0.0358965	0.239081		0.0313565	1.7583	0.227588
Pony	5	1.28552	0.799465	0.346909		0.643179	0.647673	0.761191		0.0489279	0.068973	0.102539		0.0181018	0.593892	0.267756
Pony	7*	0.0566989	1.37405	1.14044		0.111213	5.26217	0.610287		0.0162747	0.315175	0.165567		0.0219658	0.461818	0.691618
Pony	11	0.505881	0.763614	0.856844		0.728662	1.07243	1.49822		0.00436283	0.372121	0.333657		0.0218328	0.843675	1.28131
Pony	13	3.88628	1.45011	1.06401			0.562966	1.42988			0.123251	0.0985816		0.0378703	1.99452	1.68542
Pony	15	1.60775	0.507178	0.893179		2.57265	1.70425	0.809294		0.0120563	0.0556415	0.0945751		0.497914	0.547591	0.330867
Pony	17		0.0274472	0.866964			0.778044	0.831751			0.0233936	0.0741196		0.0109871	0.0735335	0.188011
Pony	19		0.688089	0.907903			0.914877	0.258724			0.0416477	0.122728		0.0224601	0.199615	0.42074
Pony	21	0.552381	0.328047	0.83062		1.1067	0.327227	0.842214		0.0473506	0.101243	0.060916		0.0817154	0.121026	1.01094
Horse	4*	1.15128	1.77837	0.789378		2.3704	2.68124	2.21747		0.078827	1.35645	0.377232		0.713764	1.21816	0.54121
Horse	6#	0.538783	1.18905	1.11892		0.518208	1.3459	1.54742		0.0954066	0.93594	0.805105		0.77627	1.25447	0.759111
Horse	8	0.78877	1.10212	0.613862		1.12565	1.10212	1.48039		0.104502	0.556733	0.564623		1.07561	1.70419	0.772343
Horse	10	2.26531	0.752966	1.38981		2.553	1.30547	1.19349		0.166461	0.182056	0.156108		2.05245	1.10443	0.93301
Horse	12	1.10326	1.03953	1.21676		1.18867	1.30633	1.89488		0.52992	0.576161	0.262544		0.943721	0.955927	1.9081
Horse	14	0.926254	1.81991	0.85473		1.06435	2.5754	1.32939		0.0342194	0.565361	0.236452		1.34157	2.66559	1.53324
Horse	16	1.01098	1.6763	0.582335		1.47767	2.89658	1.09775		0.254118	0.485952	0.232154		1.11803	1.02972	1.38936
Horse	20	1.70527	1.41017	0.985226		1.29941	0.781917	0.874599		1.19396	0.689379	0.50061		3.03	1.29119	1.40996
Horse	22	1.05541	0.558739	0.672859		1.05171	1.08002	1.04946		0.105852	0.18754	0.358554		2.89371	0.670437	0.704479
~original data normalized against the geometric mean of the reference genes RPL32 and 18S
* equines with ID and laminitis
# equine with ID
